# Supplementary material
Source: MDPI journal article supplement (https://www.mdpi.com/2072-4292/9/3/276)
Supplement: s1 [file s1]

# Supplementary Materials: Multi-Stack Persistent Scatterer Interferometry Analysis in Wider Athens, Greece. *Remote Sens.* 2017, 9, 276.

Ioannis Papoutsis, Charalampos Kontoes and Demitrios Paradissis

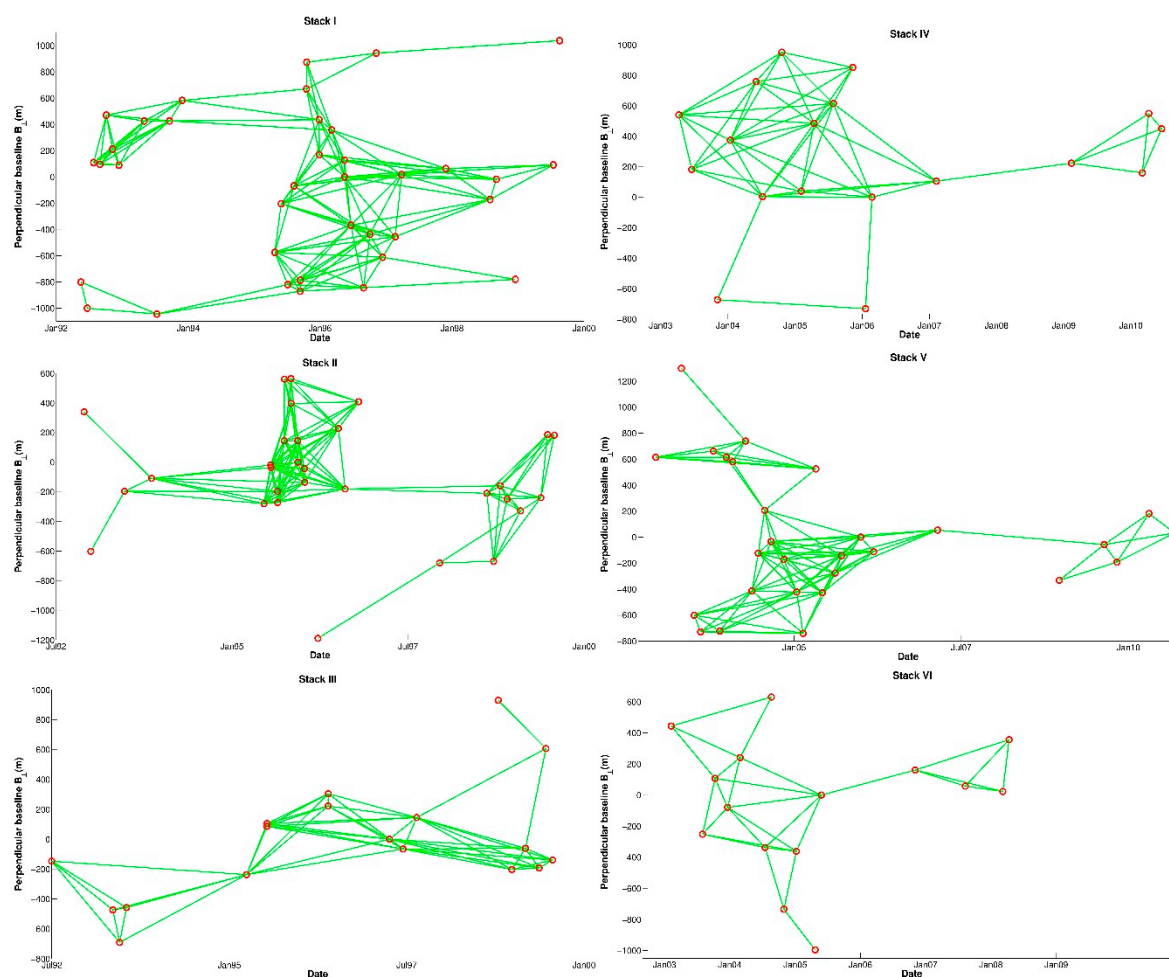

**Figure S1.** The SBAS interferometric pair networks processed for each stack, following the parameters defined in Table 1 of the manuscript. Red circles correspond to the SAR imagery, while the green lines to interferometric pairs. All computed pairs are part of the same network and no isolated interferograms are formed. The distribution of the perpendicular baselines is marked in the vertical axis.

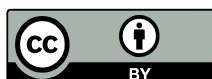

© 2017 by the authors. Licensee MDPI, Basel, Switzerland. This article is an open access article distributed under the terms and conditions of the Creative Commons Attribution (CC-BY) license (<http://creativecommons.org/licenses/by/4.0/>).
